1 **Version 4 (10-09-2020):** this manuscript is a non-peer reviewed preprint shared via the BiorXiv server  
2 while being considered for publication in a peer-reviewed academic journal. Please refer to the permanent  
3 digital object identifier (<https://doi.org/10.1101/2020.08.11.246058>).

4 **Under the Creative Commons license ([CC-BY Attribution-NonCommercial-NoDerivatives 4.0](https://creativecommons.org/licenses/by-nc-nd/4.0/)**  
5 **[International](https://creativecommons.org/licenses/by-nc-nd/4.0/)) you are free to share the material as long as the authors are credited, you link to the**  
6 **license, and indicate if any changes have been made. You may not share the work in any way that**  
7 **suggests the licensor endorses you or your use. You cannot change the work in any way or use it**  
8 **commercially.**

# 9 The historic range and drivers of decline of 10 the Tapanuli orangutan

11 Erik Meijaard<sup>1,2,3,\*</sup>, Safwanah Ni'matullah<sup>1</sup>, Rona Dennis<sup>1</sup>, Julie Sherman<sup>1,4</sup>, Onrizal<sup>5</sup> and Serge A. Wich<sup>6</sup>

12 <sup>1</sup> Borneo Futures, Bandar Seri Begawan, Brunei Darussalam

13 <sup>2</sup> Durrell Institute of Conservation and Ecology, University of Kent, Canterbury, UK

14 <sup>3</sup> School of Biological Sciences, University of Queensland, St Lucia, Australia

15 <sup>4</sup> Wildlife Impact. PO Box 31062, Portland, Oregon, USA

16 <sup>5</sup> University of Sumatera Utara, Medan, Indonesia

17 <sup>6</sup> Liverpool John Moores University, Liverpool, UK

18  
19 \* Corresponding author

20 E-mail: [emeijaard@gmail.com](mailto:emeijaard@gmail.com)

## 21 Abstract

22 The Tapanuli orangutan (*Pongo tapanuliensis*) is the most threatened great ape species in the world. It is  
23 restricted to an area of about 1,000 km<sup>2</sup> of upland forest where fewer than 800 animals survive in three  
24 declining subpopulations. Through a historical ecology approach involving analysis of reports and other  
25 literature from the early 1800s to 2009, we demonstrate that historically *Pongo tapanuliensis* lived in a  
26 much larger area, and across a much wider range of habitat types than now. Its current Extent of  
27 Occurrence is between 2.7% and 5.0% of the historical range in the 1890s and 1940s respectively. A  
28 combination of historical fragmentation of forest habitats, mostly for small-scale agriculture, and  
29 unsustainable hunting likely drove various populations to the south, east and west of the current  
30 population to extinction. This happened prior to the industrial-scale forest conversion that started in the  
31 1970s. Our findings indicate how sensitive *P. tapanuliensis* is to the combined effects of habitat  
32 fragmentation and unsustainable take-off rates. Saving this species will require prevention of any further  
33 fragmentation and killings or other removal of animals from the remaining population. Without concerted

34 action to achieve this, the remaining populations of *P. tapanuliensis* are doomed to become extinct within  
35 several orangutan generations.

## 36 Introduction

37 Determining the key drivers of population decline is a primary objective in conservation biology and  
38 wildlife management. Many wildlife species are threatened by a range of different and often interacting  
39 factors, and developing effective conservation strategies requires unravelling how these threats interact  
40 [1]. This is rarely easy, because species operate in complex socio-ecological systems in which different  
41 components are affected by a range of anthropomorphic factors such as habitat loss and fragmentation or  
42 unsustainable harvest. Evidence-based conservation seeks to address this by quantifying the relationships  
43 between conservation actions, change in threat severity and change in conservation status [2, 3].  
44 Collecting evidence is, however, time-consuming, and when conservation problems are “wicked”, i.e., the  
45 problems change as solutions are found [4], a stable solution may not be found to a particular  
46 conservation problem [5]. This often means that scientific evidence does not support clear-cut conclusions  
47 in value-driven debates that characterize conservation [6]. Nevertheless, conservation advocates often  
48 seek simple narratives to convince the public of the urgency of environmental problems and the need to  
49 support it.

50 One way to bring more clarity in often polarized debates around simple narratives is to be more specific  
51 about the system in which a particular problem plays out. For example, if the system boundaries are  
52 limited to oil palm as an ecological threat to orangutan survival [7], a simple solution would be to ban  
53 palm oil use and to stop its production, preventing further deforestation. If the system boundaries are  
54 extended to include smallholder farmers who produce palm oil for their own needs as well as international  
55 markets, a ban on palm oil would encompass broader ethical connotations as it would affect people’s  
56 livelihoods [8]. The use of different perspectives in complex conservation contexts may not make it easier  
57 to solve them but can provide helpful insights about the system boundaries of a particular problem. Are  
58 they, for example, mostly ecological, or do they involve human threats, such as hunting, or societal  
59 ethics? One such perspective is history. Looking back in time on the development of a particular problem  
60 may provide insights about the underlying drivers of that problem [9]. The historical ecology approach  
61 uses historical knowledge on the management of ecosystems or species [10]. Referring to historical  
62 evidence has, for example, provided valuable understanding about the ecology of orangutans and what  
63 likely caused their decline during the Late Pleistocene and Holocene, which informs their management  
64 today [11]. Here we apply an analysis of historical ecology to one particular species of orangutan, *P.*  
65 *tapanuliensis*, by analysing rarely used colonial-era literature to better understand the historical  
66 distribution of the species. Indonesia’s colonial literature on natural history was mostly written in Dutch  
67 and German, and is not commonly used by conservation scientists working in Indonesia.

68 *Pongo tapanuliensis* was described in 2017 as a third species of orangutan [12], 20 years after this  
69 orangutan population was formally reported to modern science [13]. The species is restricted to three  
70 areas of mostly upland forest in the Batang Toru area in North Sumatra (Fig 1), totalling approximately  
71 1,023 km<sup>2</sup> [14, 15]. This orangutan population had been largely overlooked by science, despite having  
72 been tentatively described in the colonial literature [16]. The estimated total number of wild *P.*  
73 *tapanuliensis* is currently 767 [95%: 213-1,597, 14] making this the great ape species with the lowest  
74 number of individuals in the wild and perhaps the most threatened in the world [17].

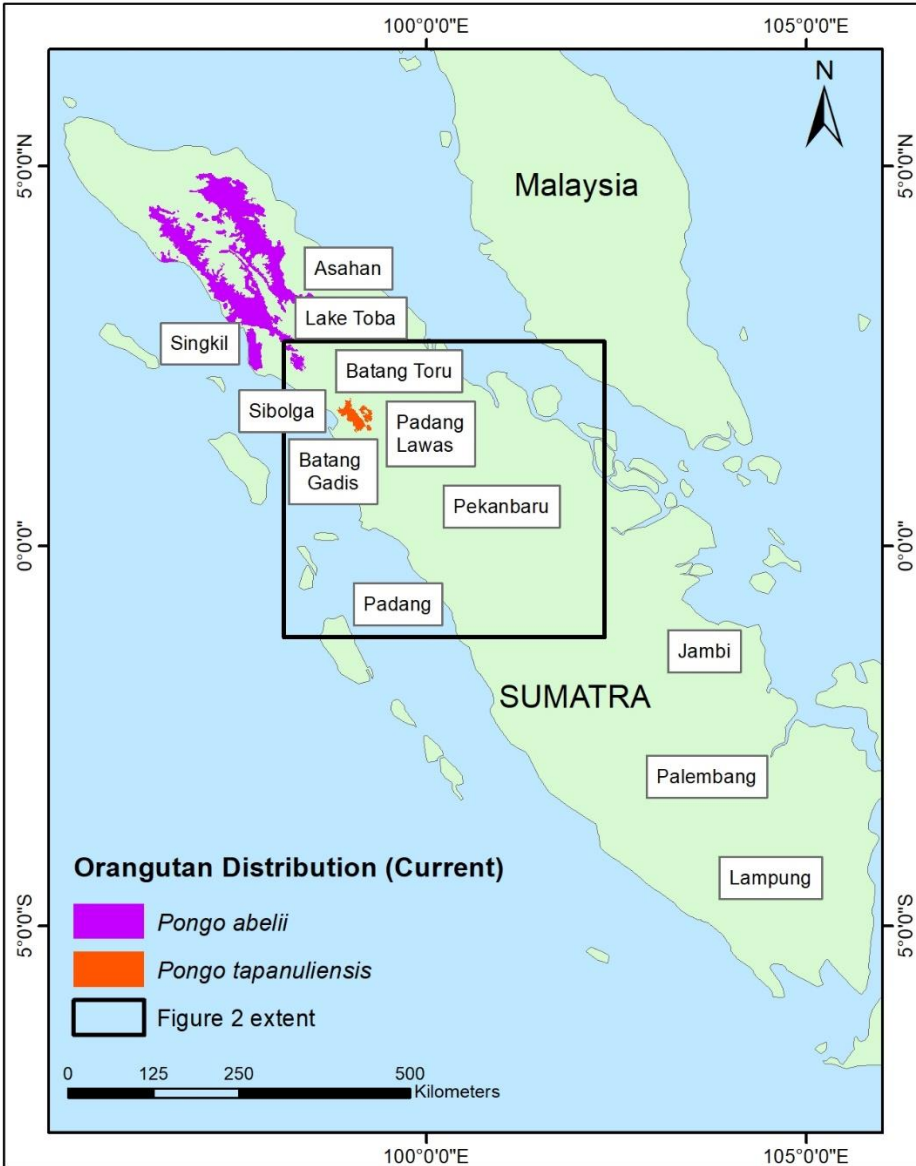

75

76 **Fig 1. Map of the island of Sumatra, showing the distribution ranges of *P. tapanuliensis* and *P.***  
77 ***abelii*, and the main locations (cities, districts and other geographic features) mentioned in the text.**  
78 **The inset shows the area of Fig 2.**

79 The species is currently under threat of habitat loss from agriculture, hunting and conflict killing, and  
80 development in the area for infrastructure, gold mining, and geothermal and hydro-energy. These threaten  
81 to further reduce and fragment remaining habitat, reduce dispersal opportunities for the orangutans  
82 between subpopulations, and undermine population viability through unsustainable mortality rates [14,  
83 18-21]. Due to its restricted current distribution mostly centred around higher elevations ( $834.4 \pm 219.3$  m  
84 asl) compared to  $701.7 \pm 454.8$  m asl for the Sumatran orangutan (*P. abelii*) and  $170.6 \pm 187.0$  m asl for the  
85 Bornean orangutan (*P. pygmaeus*) [22], it has been argued that the individuals of the species have adapted  
86 specifically to the uplands that cover most of its current distribution in Batang Toru [18]. What is not  
87 clear is whether the current existing altitudinal differences between the orangutan species are the result of  
88 ecological specializations to highland ecological conditions, or whether the highland species now occur at  
89 higher altitudes because their previous lowland habitats no longer exist or because the species became

90 extinct there. The fossil record for Sumatran orangutans confirms that the genus *Pongo* was once more  
91 widespread. Extensive remains from the Late Pleistocene and Holocene have been excavated from a  
92 range of caves in the Padang Highlands, some 300 km south of the current range [23] (Fig 1). Why the  
93 species disappeared from that part of Sumatra remains unclear but unsustainable hunting is one of the  
94 possible explanations, because until recently large areas of suitable forest habitat remained in areas where  
95 orangutans are now extinct [24]. Given that, in the past, forest cover was also much more widespread in  
96 the range of *P. tapanuliensis*, it is important to determine whether historically (ca. past 500 years)  
97 orangutans did occur in those areas. This would help establish whether *P. tapanuliensis* has indeed  
98 evolved to only live in the highlands and to estimate what its past distribution could have been.

99 The aim of this paper is to compile reports of orangutans occurring to the south of Lake Toba (Fig 1) with  
100 the focus on determining how reliable these are, and, where feasible, provide a location for the occurrence  
101 of orangutans to assess whether these are predominantly highland sites, and to assess which factors could  
102 have led to their disappearance in those areas. Based on the information we develop historical distribution  
103 maps as reference points for understanding historical population declines, and potentially also set long-  
104 term aspirational recovery targets for the species to ensure full ecological functionality [9].

## 105 Methods

106 We compiled records of orangutans from historical sources by searching natural history books, scientific  
107 papers, and historical newspapers from before 1940. We searched databases with location specific  
108 keywords such as Sumatra, Batang Toeroe, and Tapanoeli, using Dutch spelling. We combined this with  
109 searches for terms specifically referring to orangutans: Orang oetan, orang-oetan, orangutan, and also  
110 mawas, mias and maias (local names for orangutan commonly used in historical literature), using a  
111 variety of spellings. For the period since 1940, we used the sources from the review in Rijksen and  
112 Meijaard [24] as well as scientific papers and personal communications. To determine the locations of the  
113 historical sightings or captures we consulted the online Leiden University Library colonial map repository  
114 (<http://maps.library.leiden.edu/apps/s7>). In some cases, rivers or villages were indicated which made it  
115 feasible to estimate the location of the sightings quite accurately. In other cases, the area of the sighting or  
116 captures was indicated in a broader area which reduced accuracy (tens of kilometres).

117 We assessed the likely vegetation types that *P. tapanuliensis* would have occurred in, and determined the  
118 altitude at which they were reported. For this, we vectorised a high-resolution scanned copy of the first  
119 official forest cover map of Indonesia [25], dated 1950 and at a scale of 1:250,000,000, which is likely  
120 based on maps produced by the Netherlands-Indies cartographic service from the 1930s and 1940s. In  
121 order to analyse the map and integrate with other spatial layers in a GIS, we automatically vectorised the  
122 map using the ArcScan extension within ArcGIS [26]. The first step in the process was to geo-reference  
123 the scanned map to the coastal boundary of Sumatra. The next step was extraction of the area of interest  
124 which was then vectorized. This resulted in numerous polylines which were cleaned and edited to produce  
125 polygons representing various land cover classes. The last stage of preparing the 1950s map for  
126 integration with other spatial datasets in the GIS was to eliminate spatial distortion as much as possible  
127 for the area of interest. Old hand-drawn maps, which in this case was an Indonesia-wide map, have  
128 inherent distortion when compared to modern maps. We used a process called rubber-sheeting to make  
129 small spatial adjustments in the vectorized georeferenced map to align individual parts of the map more  
130 accurately with the coastline and inland features such as lakes and rivers. Although not a perfect match,  
131 we are satisfied with the spatial accuracy of the vectorized 1950s map in terms of meeting the objectives  
132 of this analysis.

133 While the exact location of the historical orangutan sightings cannot be determined with certainty, the  
134 descriptions often provide sufficient detail through names of rivers and villages to estimate the altitude

135 and dominant vegetation where they occurred. Altitude was determined from the altitude layer in Google  
136 Earth Pro. We used the vegetation map for Sumatra [27] in combination with knowledge gained by co-  
137 author SW during surveys in the region to assign one of the forest categories to an estimated historical  
138 location.

139 To approximate the population decline of *P. tapanuliensis* in historical times, we mapped the historical  
140 range. This provides important insights about the areas and vegetation types that the species once  
141 occurred in, providing insights regarding its ecological functionality [28]. Grace et al. [9] recommend  
142 using either a 1500 AD or 1750 AD target year for mapping the historical range, unless the historical data  
143 are insufficiently accurate or reliable. Because there is uncertainty about all historical species data (unless  
144 supported by specimens), we developed two maps: 1890s and 1940s. Each of these periods have different  
145 data sources with varying reliability associated with them. By presenting these different maps,  
146 conservation scientists and policy-makers can debate the merit of accepting either of these two (or a  
147 different map altogether) to set a historical baseline for the species. Historical ranges were mapped by  
148 modelling watersheds containing historic orangutan records of breeding females separated by large rivers.  
149 We divided the island of Sumatra into potential orangutan subpopulation ranges by mapping large rivers  
150 [based on 29], coasts, and the 500 altitudinal contour. These boundaries were chosen with the assumption  
151 that female orangutans rarely disperse across these boundaries into a neighbouring watershed. Whereas  
152 subadult and adult males do disperse through areas of higher elevation and low-quality habitat, females  
153 are very rarely seen in such locations [24]. This lack of inter-watershed dispersal is supported by genetic  
154 studies [30, 31]. We assume that if one of our subpopulations is reduced below carrying capacity or goes  
155 extinct, the probability of recolonization by immigrating females is negligible. An overlay of the  
156 historical distribution range (pre-commercial timber industry) and the potential subpopulations ranges  
157 resulted in a map of areas with or without orangutan populations.

## 158 Results

### 159 Historical accounts

160 We report the various historical accounts of orangutan sightings or specimens from outside the currently  
161 known range in chronological order, starting with Nikolaas Tulp [32] who in 1641 reported on a specimen  
162 of “Indian Satyr” he had received, which had been collected in “Angola”, most likely the former district  
163 of Angkola (no. 1 in Fig 2) [24], which is now part of South Tapanuli District. His descriptions and  
164 drawings indicate an orangutan, “of female sex”, as Tulp writes. Several authors [e.g., 33, 34] argued that  
165 Tulp more likely referred to the African country of Angola and that his specimen was therefore likely a  
166 chimpanzee or gorilla and not an orangutan. Rijksen and Meijaard [24], however, pointed out that Tulp  
167 specifically referred to his “Indian” specimen being distinct from the African species, and also mentions  
168 that the species occurs of the island of Borneo.

169 Schlegel and Mueller [35] reported on two orangutan crania that were obtained by a military doctor in the  
170 environs of Jambi, some 650 km south-east of the current closest orangutan population (Fig 1). It is  
171 unclear whether these animals were obtained in Jambi from the wild or whether they were in captivity and  
172 possibly originated from northern Sumatra. Schlegel and Mueller reported that the two skulls were housed  
173 in the “Rijks-Museum”, which presumably refers to the Leiden Museum of Natural History. We were  
174 unable to locate these specimens in the Leiden collection. Schlegel and Mueller further wrote that on the  
175 west coast of Sumatra, especially north of the equator, the orangutan was known by the name *mawej*,  
176 although in areas further south such as Indrapura and Bengkulu, the names *orang-panda* or *orang-pandak*  
177 were used. Co-author Onrizal, remembers growing up east of Padang (Sungai Dareh) listening to stories

178 about *orang-pendek*, human-like creatures living in the forest, which reportedly ceased to exist in the area  
179 in the 1970s. Stories of such *orang-pendek* [or other names, such as gugu, sedapa, orang lètje or orang  
180 segagang, see 36, 37] abound in other parts of southern Sumatra and there has been speculation for over a  
181 century that these could be remnant orangutan populations [38-41], although evidence remains lacking.  
182 For the purpose of the current paper we do not focus on the *orang-pendek* narratives, but recognize that  
183 many of these narratives could indeed refer to orangutans, as suggested compellingly by Forth [37].

184 Schlegel and Mueller [35] acknowledged that the orangutan was especially common in the north-east of  
185 Sumatra, but that occasionally they were encountered further south and along the western shores of  
186 Sumatra. Also, the species had been reported from Indrapura (in present-day Riau Province) and near  
187 Padang (in West Sumatra, Fig 1), although the descriptions by Schlegel and Müller are insufficient to  
188 confirm that these reports referred to orangutans. Earlier writings by Müller [42], however, clarify this, as  
189 he refers to “orang-oetan” which locals named “mawej” that one could occasionally encounter in the  
190 extensive forests and swamp forests in, what is now, Kampar Regency, roughly between the towns of  
191 Salo and Gunung Sahilan (no. 2 in Fig 2).

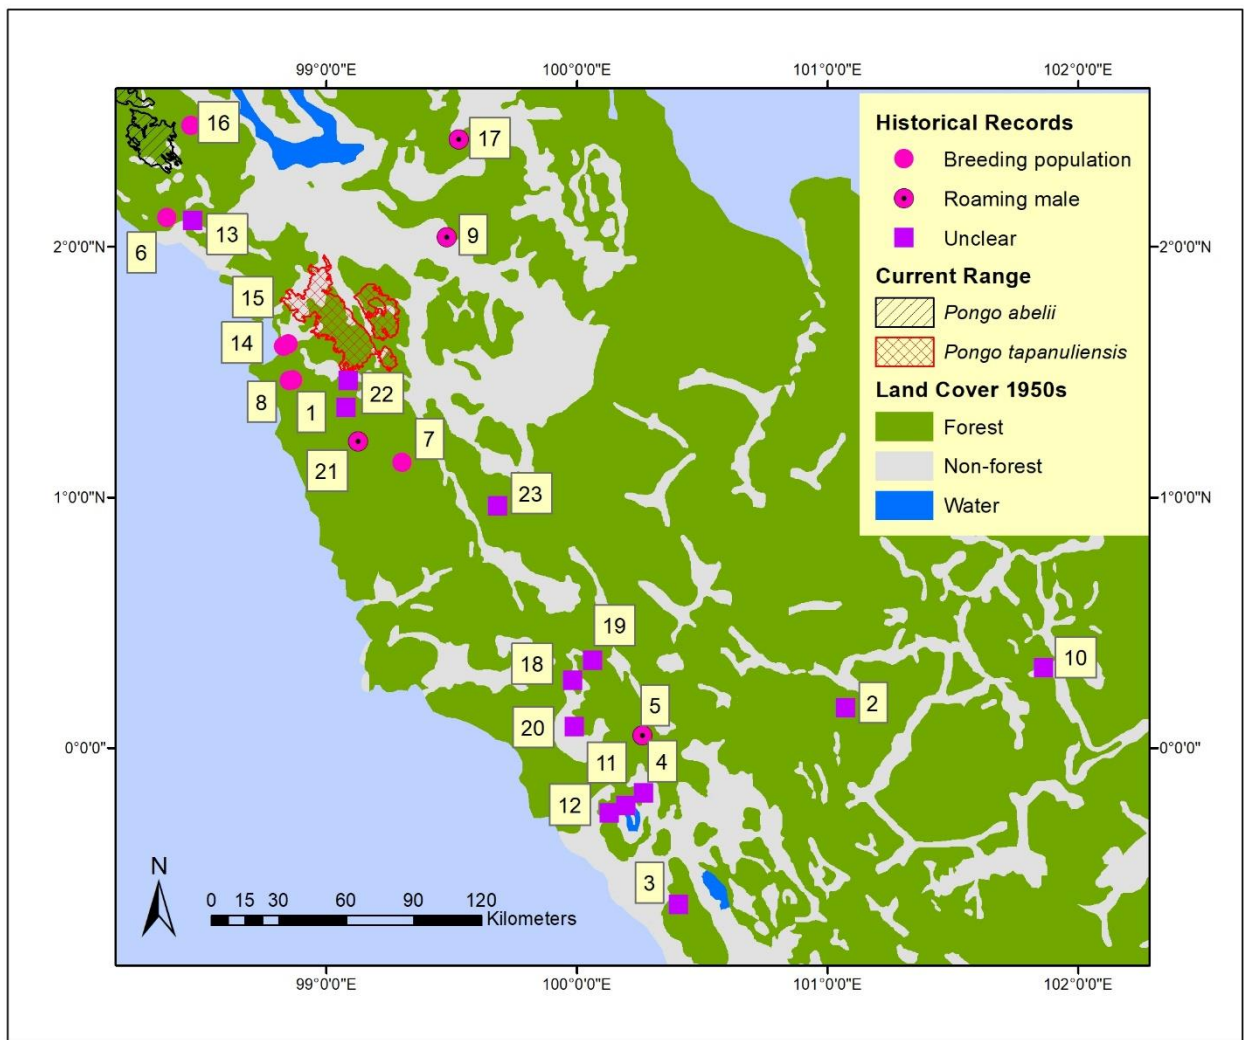

192 **Fig 2. Map showing points where orangutans were historically reported and the forest cover in**  
193 **1950 before large-scale commercial forest exploitation began.**

194 A letter from an anonymous Dutch missionary published in 1892 [43] mentions orangutan sightings,  
195 although the letter was 50 years old then, so approximately referring to 1842. It mentions that “monkeys,  
196 and especially ‘orang-oetangs’” made life difficult to people travelling inland from Padang, by throwing  
197 “stones, coconuts, branches, and others” at travellers through the “Padansche Bovenlanden”,  
198 approximately in the area that is now Bukittinggi (no. 3 in Fig 2). It specifically mentions an event during  
199 which someone was attacked by orangutans half-way between Fort de Kock (in Bukittinggi) and Bonjol  
200 (no. 4 in Fig 2).

201 In further description of their travels across Sumatra, Müller and Horner [44] wrote that orangutans were  
202 not unknown in the Tapanuli area and especially common in “Taroemon”, i.e., present-day Trumon in the  
203 Singkil area (Fig 1), which is part of the *P. abelii* range. They report that people distinguished between  
204 two types of orangutans, the *maweh baroet* (baroet meaning monkey in the local language) and *maweh*  
205 *orang* (the ‘human’ orangutan). Ludeking [45], in his descriptions of West Sumatra, mentions a record of  
206 a six feet tall, upright primate, possibly an adult male orangutan, that his informants had seen on *Bukit*  
207 *Gedang*, which is close to present-day Bonjol (no. 5 in Fig 2). A decade later, Von Rosenberg [46] did not  
208 provide much detail but similarly mentioned that orangutans were present north of “Tapanoeli” (what is  
209 now Sibolga) to Singkil (Fig 1), indicating presence of the species in the coastal lowlands west of Lake  
210 Toba (no. 6 in Fig 2). He saw two orangutans but did not clarify where he saw them, although Snelleman  
211 [47] stated that von Rosenberg had seen “two youthful specimens” in the area between Tapanuli and  
212 Singkil.

213 Kramm [48] reported on a hunting expedition near “Soeroe Mantinggi”, where he found several  
214 orangutans and observed them for several hours. The location likely referred to Sayur Matinggi (no. 7 in  
215 Fig 2), which is currently located in the Batang Gadis area, some 50 km south of the current range of *P.*  
216 *tapanuliensis*. Kramm mentioned that Soeroe Mantinggi is located at a distance of 22 “*palen*” from  
217 Padang Sidempoean. A “paal” was a measurement used in the Netherlands-Indies, equalling 1852 m on  
218 Sumatra, indicating a distance of about 40 km for 22 “*palen*”. Sayur Matinggi is currently located some  
219 26 km from Padangsidempuan as the crow flies which indicates that indeed this is likely to be the location  
220 where Kramm observed orangutans. Kramm was familiar with orangutans which he reported to have also  
221 encountered in “Loemoet” and “Batang-Taro”. We believe that the former refers to Lumut (no. 8 in Fig  
222 2), just south of Sibolga (Fig 1), and that Batang-Taro is an older name for the Batang Toru area, where *P.*  
223 *tapanuliensis* occurs until today.

224 Orangutans also seem to have occurred northeast of the current range of the Tapanuli Orangutan.  
225 Neumann [49] described the species from “Hadjoran”, which was located in the watershed of the “Batang  
226 Si Ombal” and “Aek Hiloeng”, and for which the following coordinates were given: N 2°1’25” and E  
227 99°29’, in the current district of Padang Lawas (Fig 1, no. 9 in Fig 2). This is about 50 km northeast of the  
228 most eastern current range of *P. tapanuliensis*. The detailed description, however, suggests that the  
229 species was very rare there, and the people of “Hadjoran” had not seen the orangutan there before. The  
230 animal was shot, with descriptions of the local people suggesting it was at least 1 m tall, possibly  
231 indicating an adult male, which are known to roam far from breeding populations. Neumann writes that  
232 he travelled extensively through forest areas in the Padang Lawas area searching for orangutans but never  
233 managed to encounter one.

234 Snelleman [47] mentioned a report from a government employee in Lampung (Fig 1) who had heard  
235 about orangutans in that part of far southern Sumatra. Several hunts were organized to find the orangutans  
236 but these were unsuccessful, and also when local people were asked they stated that they had only  
237 heard about orangutans in that area from hearsay but that they could not pinpoint where orangutans were  
238 supposed to occur. We did not add these records to the maps as their reliability seems low.

239 An interesting reference to orangutans, as far south-east as Pelalawan is provided by Twiss [50] who  
240 described a record reported in the Tijdschrift van het Binnenlandsch Bestuur, Vol. III, p. 138 by mr  
241 “L.H.” [51], who was on a trip to *Poeloe Lawan* (Pelelawan) near the confluence of the Batang Nilo and  
242 Kampar Rivers (no. 10 in Fig 2) in 1888, and had an orangutan in his visor, but decided not to shoot it as  
243 he had nothing on him to prepare the skin. Twiss [50] reported that L.H. was familiar with orangutans  
244 from ones he had seen on Borneo, so the chance of a mistaken identification are small. Twiss also  
245 reported that 18 to 20 years prior to his writings (i.e., around 1870), an orangutan was shot in the  
246 mountains around Lake Maninjau (no. 11 in Fig 2), while older people remember seeing orangutans,  
247 albeit very rarely, in forests on Bukit Silajang (no. 12 in Fig 2), a mountain near Lubuk Basung [50].

248 Hagen [52, p. 66] stated that orangutans were known from the west coast between Tapanuli and Singkil  
249 (no. 13 in Fig 2), although Singkil is in the range of *P. abelii* and it is not clear whether the coastal  
250 Tapanuli reference referred to the area of the current range of *P. tapanuliensis*, or whether it referred to  
251 what is now the Central Tapanuli District which extends to the southern part of Singkil, west of Lake  
252 Toba. Interestingly, he referred to an orangutan from the interior of Padang (in reference to an article by  
253 S. Jentink, Aardrijkskundig Weekblad, 1881, No. 44, p. 287 – not seen by the authors), in west Sumatra  
254 that ended up in the Rotterdam Zoo where it died of a bone deformation disease (the skull is kept in the  
255 Natural History museum in Leiden, the Netherlands: RMNH.MAM.544).

256 Miller [53, p. 483] in his account about the mammals collected by W.L. Abbott on the west coast of  
257 Sumatra in 1901 and 1902 mentioned the following about orangutans: “The orang utan exists, but not  
258 abundantly, about Tapanuli Bay. Two miles up the Jaga Jaga River (no. 14 in Fig 2) some nibong palms  
259 were seen that had been broken off by oranges, and also an old sarong (shelter), but the traces were old.  
260 There were said to be more a few miles farther inland, particularly up the Berdiri River (no. 15 in Fig 2).  
261 The natives say they always go about in pairs.” Miller described the Jaga Jaga River as “a stream near the  
262 south end of the Tapanuli or Sibolga Bay”. We located the Berdiri River on an old map under the name  
263 “Bardari River”, and we located “Djaga Djaga” as well.

264 Beccari [54] reported orangutans around Rambung, in the Tapanuli region, and in the hinterland of  
265 Sibolga, where he collected a specimen. We were unable to determine the location of Rambung but there  
266 is a Rambong north of the Singkil area, and thus well in *P. abelli* range. The hinterland of Sibolga could  
267 either refer to the current *P. tapanuliensis* population or the historical range – we were unable to  
268 determine whether this specimen still exists, and, if so, where. Beccari further stated that “in the  
269 Zoological Museum at Florence is the skeleton of a young orang-utan, described as coming from  
270 Palembang (Fig 1), on the east coast of Sumatra”, some 800 km southeast of the nearest current orangutan  
271 population. We contacted the curator of the Florence museum, who wrote in response that the specimen  
272 was indeed present under specimen number MZUF-12: “The specimen was purchased in 1889 in London  
273 (G.A. Frank, 9 Haverstock Hill, London). It is a subadult male. The place of origin is Palembang, but it  
274 may have been captured elsewhere. There are no manifest connections with O. Beccari.” Gustav Adolf  
275 Frank was a well-known natural history trader based in Amsterdam and London, and he probably had a  
276 good network of local suppliers. The description of the skeleton provided by Agnelli and colleagues [55]  
277 is inconclusive as to what species it belongs to. We can therefore not know for sure whether the animal  
278 was caught near Palembang and transported to Europe from there, or whether it originated from northern  
279 Sumatra (either of the two known species).

280 Volz [56] wrote about the distribution of orangutans on Sumatra, although it is not clear to what extend  
281 the information is informed by Volz’ own surveys or interpretation of secondary information. Volz  
282 suggested that there were no orangutans east of the Langkat River, which he thought was likely the  
283 remnant of a large bay or sea connection that once separated north and south Sumatra approximately in a  
284 line from Sibolga to north of Medan. He expanded on this in his work a few years later [57], in which he  
285 also described additional orangutan sightings. This included a sighting in the upland area west of Lake



286 Toba at an elevation of 1,400 m asl (no. 16 in Fig 2). Referring to the same area, Kohler [58] described a  
287 visit to Sibolga where the host had a young orangutan which had been caught in the forest on the west of  
288 the Toba lake, indicating a breeding population there. Volz [56] also described a sighting of an orangutan  
289 east of Lake Toba in the upper Kualu River area (ca. N 2°26' E 99°32'; no. 17 in Fig 2). Again, however,  
290 the description of a large ape that moved 'slowly and ponderously' may suggest an adult male, and  
291 because people there are not familiar with the species, possibly a wandering male outside the range of a  
292 breeding population.

293 Delmont [59] described a hunting expedition on the upper Musi River, near "Sekajoe" in the foothills of  
294 the Barisan mountain range in what is now South Sumatra Province. His informant, Mr Ghoba Ramah,  
295 told him that orangutans were particularly common in the area and were raiding the crops of local  
296 farmers. After four weeks, they managed to catch seven orangutans. They then moved to a location four  
297 hours rowing upstream, where they quickly observed a female orangutan with young. They set out cages  
298 with fruit bait for capturing orangutans, but the first morning after arrival they had only managed to catch  
299 some monkeys and a pig. After that they were more successful and claimed to have caught one male  
300 orangutan and a female with young, and over the next few days they caught several more orangutans.  
301 Delmont's stories are intriguing but strike us as somewhat fantastical, as it is unlikely that anyone could  
302 catch significant numbers of orangutans with baited cages. More likely these could be Pig-tailed  
303 Macaques, *Macaca nemestrina*, who indeed move about in groups, raid crops and can be trapped in cages.  
304 We therefore do not consider this source to be reliable, and don't include this record in Fig 2 unless  
305 evidence (e.g., specimens) is found for Delmont's claims in 1935.

306 The various historical accounts above were summarized in a map drawn by van Heurn [60] which shows  
307 that clearly the conservation community was aware of the existence of orangutans south, west and east of  
308 Lake Toba. Interestingly, though this map depicts the current Batang Toru population to be part of the  
309 range where the species had become extinct, while the only extant population is a narrow band to the east  
310 of Lake Toba in the Asahan District (Fig 1), where the species is not currently known. It suggests that  
311 information about orangutan distribution was still rudimentary in the 1930s, which may have the reason  
312 for a request to C.R. Carpenter [61] who conducted a survey on behalf of the Nederlandsch-Indische  
313 Vereeniging tot Natuurbescherming. He worked mostly in the northern parts of Sumatra and sent  
314 questionnaires to Dutch soldiers stationed in areas where orangutans could potentially occur. Carpenter  
315 assumed that orangutan did not occur south of a line drawn from Singkil to the Sumatran east coast, thus  
316 overlooking much of the historical evidence of orangutans south of Lake Toba. Carpenter's  
317 questionnaires, however, included three reports of orangutans outside the known range. The first is from  
318 Captain H.J. Kloprogge who had been based in Aceh, Siak, Indrapura and Pekanbaru (Fig 1) between  
319 1921 and 1936, spending an average 12 days per months in the forest on patrol. He claimed to have seen  
320 orangutans "two to four" times during forest patrols, and indicated their presence on the hand-drawn map  
321 accompanying the questionnaire throughout Aceh and the current Batang Toru range area. Second,  
322 Captain M. Kooistra reported seeing 12 orangutans in Aceh and also indicated them as present on his map  
323 near Jambi (Muara Tembesi), where he had been stationed in 1925 and 1926 (Fig 1). As there is no  
324 further information about this record, we do not include it in Fig 2. Third, Captain H.G.C. Pel was  
325 stationed in Siak (near Pekanbaru, Fig 1) from 1933 to 1935, and reported seeing an orangutan in  
326 captivity north of the town of Talu (no. 18 in Fig 2), on a tributary of the Kampar River. We consider it  
327 unlikely that such a captive orangutan in a remote village would have been transported to the area, and  
328 map this point as likely present. We do not map a report of orangutan presence in Batang Toru and  
329 Sipirok from 1939 [62], as these are still part of the current range.

330 There seems to be a gap in records between the 1930s and 1970s, but in the early 1970s, the Indonesian  
331 forester Kiras S. Depari reported orangutan sightings along the Batang Toru River, in the Sibual-buali  
332 Reserve and in the Rimbu Pantu Wildlife Reserve (no. 19 in Fig 2) [16]. Borner [63] also noted that a 10-  
333 12 year old male orangutan had been shot just outside Rimbu Pantu, and that villagers had shortly before

334 seen “two other black ‘orang-utans’ walking on the ground”, but his surveys could not find any nests.  
 335 Borner also interviewed timber workers in Torgamba in the South Labuhan Batu District, who said that  
 336 orangutans occurred in those forests but Borner’s surveys could again not verify this. Two other  
 337 primatologists, C.C. Wilson and W.L. Wilson [64, not seen] confirmed the presence of orangutans in  
 338 South Tapanuli, while also reporting them around Pekanbaru, in Riau Province. Herman Rijksen (*in*  
 339 *litt.*, 17 Oct 2019) reported receiving two captive juvenile orangutans, which, according to the Indonesian  
 340 conservation authorities, had been confiscated in “Angkola”. Finally, the presence of orangutans was  
 341 indicated by a botanist and a wildlife researcher on Gunung Talamau (no. 20 in Fig 2; Laumonier, pers.  
 342 comm.). Presence in this region was confirmed by a survey in 1996 by Rijksen, Meijaard and van Schaik  
 343 [13], when several nests were found on the edge of this Reserve, but follow up surveys by SW could not  
 344 confirm this report and suggested that the nests may have been eagle nests. Meijaard [13] did describe  
 345 various reported orangutan sightings from the Batang Gadis area, including a large, possibly male,  
 346 orangutan close to the Bhara Induk logging base camp (no. 21 in Fig 2), although field surveys did not  
 347 reveal any nests.

348 More recently, Wich et al. [65] found several orangutan nests in the peat swamp forests near Lumut (no. 8  
 349 in Fig 2) and heard a male long call in the same area. Local community members mentioned that they had  
 350 also seen orangutans in the area [65]. Approximately 2 km south of the Batang Toru River (southeast of  
 351 the village of Batang Toru), a geologist (Martin Jones) spotted a solitary orangutan in the forest in 2004  
 352 (no. 22 in Fig 2). Finally, Bradshaw, Isagi [66] reported on orangutans in the Barumon Wildlife Reserve  
 353 in the Padang Lawas District (no. 23 in Fig 2). Nests were reportedly encountered and one staff of the  
 354 local conservation department reported a direct encounter with an orangutan in 2009.

355 While there is significant spatial inaccuracy in the historical records of *P. tapanuliensis* outside the  
 356 current range, we can still make an educated guess of the different habitats and altitudes in which these  
 357 populations occurred (Table 1). Habitats in which the species once occurred included tall peat swamp  
 358 forest, freshwater swamp forest mosaic and secondary forest, forest on limestone, hill forest between 300  
 359 and 1,000 a.s.l., and submontane forest between 1,000 and 1,800 m a.s.l., indicating the full range of  
 360 habitats that is also used by *P. abelii* [16].

361 **Table 1. Orangutan records, most likely *P. tapanuliensis*, but outside the current range, that we**  
 362 **consider to be reliable.**

| Number         | Location                        | Source             | Information type            | Vegetation                             | Likely status       |
|----------------|---------------------------------|--------------------|-----------------------------|----------------------------------------|---------------------|
| 1 <sup>a</sup> | Angola                          | Tulp 1641          | Specimen seen by author     |                                        |                     |
| 2 <sup>a</sup> | Kampar Regency                  | Müller 1837        | Anecdotal                   | Lowland Forest <150m (logged)          | Unclear             |
| 3              | Around Bukittinggi              | Anonymous 1842     | Anecdotal                   |                                        |                     |
| 4              | Between Fort de Kock and Bonjol | Anonymous 1842     | Anecdotal                   |                                        |                     |
| 5              | Bukit Gedang                    | Ludeking 1862      | Anecdotal                   | Sub-Montane Forest 1000 – 1800m        | Roaming male        |
| 6              | Tapanoeli                       | Von Rosenberg 1878 | Anecdotal or seen by author | Forest 300-1000m (logged)              | Breeding population |
| 7              | Sayur Matinggi                  | Kramm 1879         | Seen by author              | Limestone/Secondary Forest 300 - 1000m | Breeding population |
| 8              | Loemoet                         | Kramm 1879         | Seen by author              | Tall Peat Swamp Forest                 | Breeding population |

|    |                                |                                                           |                                   |                                          |                     |
|----|--------------------------------|-----------------------------------------------------------|-----------------------------------|------------------------------------------|---------------------|
| 8  | Lumut                          | Nests observed by Serge Wich and Tine Geurts in June 2001 | Seen by author                    | Tall Peat Swamp Forest                   | Breeding population |
| 8  | Nests near Lumut               | Nests observed by Serge Wich and Tine Geurts in June 2001 | Seen by author                    | Tall Peat Swamp Forest                   | Breeding population |
| 9  | Hadjoran                       | Neumann 1885                                              | Anecdotal                         | Forest 300-1000m (Sibolangit)            | Roaming male        |
| 10 | Batang Nilo                    | L.H. 1888                                                 | Anecdotal                         | Lowland Freshwater Swamp Forest (logged) | Unclear             |
| 11 | Lake Maninjau                  | Twiss 1890                                                | Anecdotal                         | Secondary Forest >1000m                  | Unclear             |
| 12 | Bukit Silajang                 | Twiss 1890                                                | Anecdotal                         | Secondary Forest >1000m                  | Unclear             |
| 13 | West Coast                     | Hagen 1890                                                | Anecdotal + reference to specimen | Forest 300-1000m (logged)                | Unclear             |
| 14 | Jaga Jaga                      | Miller 1903                                               | Anecdotal                         | Tall Swamp Forest (Shallow Peat)         | Breeding population |
| 15 | Berdiri River                  | Miller 1903                                               | Anecdotal                         | Secondary Mosaic <300m                   | Breeding population |
| 16 | Upland areas west of Lake Toba | Volz 1912                                                 | Unclear, probably anecdotal       | 1400 m                                   | Breeding population |
| 17 | Kualu River                    | Volz 1912                                                 | Anecdotal                         | Forest <300m                             | Roaming male        |
| 18 | Talu                           | Captain H.G.C. Pel 1935                                   | Seen by author                    | Forest 300 – 1000m                       | Unclear             |
| 19 | Rimbu Panti                    | Meijaard 1997                                             | Anecdotal                         | Forest 300 - 1000m (Singkel)             | Unclear             |
| 20 | Talamau Mountain               | Laumonier 1983                                            | Seen by author                    | Submontane Forest 1000 - 1800m           | Unclear             |
| 21 | Bhara Induk logging base camp  | Meijaard 1997                                             | Anecdotal                         |                                          | Roaming male        |
| 22 | South of Batang Toru           | Orangutan observed by Martin Jones (geologist) in 2004    | Seen by author                    | Secondary Mosaic <300m                   | Unclear             |
| 23 | Barumun                        | Bradshaw et al. 2007                                      | Seen by author                    | Sub-Montane Forest 1000 – 1800m          | Unclear             |

363 <sup>a</sup> Point numbers in the table correspond to the numbers in Fig 1. Vegetation information was derived from  
 364 Laumonier [27].

## 365 Mapping the historical range

366 Akçakaya et al. [67] proposed two potential temporal benchmarks for setting historical baselines for  
 367 species distribution: the year 1500 AD and the year 1750 AD. Species that became extinct before 1500  
 368 AD are not assessed for the IUCN Red List, so choosing 1500 AD is a natural link between IUCN Red  
 369 List and Green Status frameworks [9]. Sanderson [68], however, proposed more flexible dating depending  
 370 on when locally modern humans started to negatively impact a particular species. For orangutans on  
 371 Sumatra that could be at least 30,000 years ago [11], but the fossil record from that era is limited to a few

372 sites only and does not allow reliable mapping of the orangutan's past range, or whether it indeed was the  
373 range of *P. tapanuliensis* or *P. abelii*. There is also no reliable information available in our current data  
374 for *P. tapanuliensis* in either 1500 AD or 1750 AD, so we choose to use 1890 AD as a time when there  
375 are various records that indicate the presence of orangutans through direct observation by the source [i.e.,  
376 42, 48, 51] (Fig 3). We also present an alternative historical baseline based on the distribution map drawn  
377 by van Heurn in 1935 [60], with additional records from our own dataset (Fig 3).

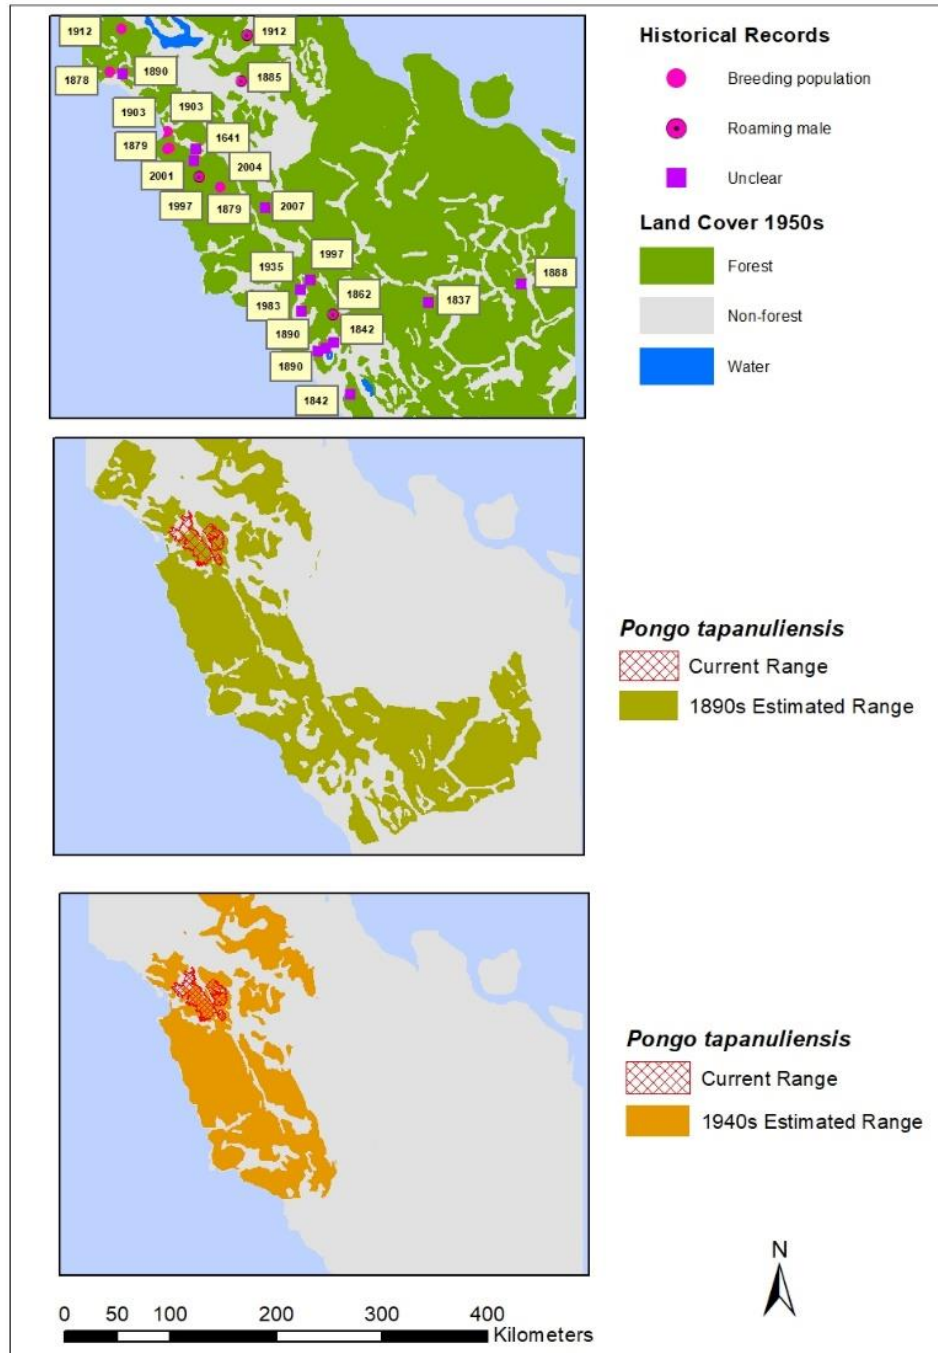

378

379 **Fig 3. Top panel: Years of historic orangutan records. Middle panel: Estimated historic range in**  
380 **1890s. Bottom panel: Estimated historic range in 1940s.**

## 381 Discussion

### 382 The historical range of *P. tapanuliensis*

383 Our historical ecology analysis of *P. tapanuliensis* indicates that the species occurred beyond its current  
384 range until quite recently, and has rapidly declined in the past 100 to 150 years. Breeding populations  
385 occurred in the Batang Gadis area (Fig 1), probably through much of today's South Tapanuli and  
386 Mandailing Natal Regencies, and further south-east in the Kampar River area. The historical records to  
387 the north of the current *P. tapanuliensis* range make it difficult to judge whether these are part of *P. abelii*  
388 or *P. tapanuliensis*. For example, the records of orangutans west of Lake Toba, could also refer to  
389 populations that still occur in the Pakpak Bharat Regency [69] and the Batu Ardan and Siranggass forest  
390 blocks in the Dairi Regency [70], which genetically are closer to *P. abelii* than *P. tapanuliensis* [71]. It is  
391 not clear whether the records in the Padang Highlands, Rimbu Panti and Padang Lawas referred to  
392 itinerant males or breeding populations but the scarcity of records could indicate that breeding  
393 populations became extinct there earlier.

394 To what extent do these historical data allow us to accurately determine the former range of *P.*  
395 *tapanuliensis*. We know from evidence of Late Pleistocene orangutan fossils in the Padang area (Lida  
396 Ajer, Ngalau Sampit, Ngalau Gupin) [72], that orangutans lived in this part of Sumatra at least until some  
397 50,000 years ago. What we do not know is whether this was *P. abelii*, *P. tapanuliensis*, or a species  
398 different from both, as suggested by Drawhorn [73]. No specimens of *P. tapanuliensis* were collected by  
399 any of the historical sources, except those reported by Hagen [52] and Beccari [54], but these have not yet  
400 been genetically analysed. There is therefore no robust evidence as to whether the orangutans reported  
401 from outside the current *P. tapanuliensis* range were *P. tapanuliensis* or *P. abelii*. Further genetic study of  
402 the specimens reportedly originating from Padang (RMNH.MAM.544) and Palembang (MZUF-12), and  
403 also of fossil teeth from the Padang Caves area (e.g., through proteomic analysis) could shed light on the  
404 taxonomic status of the orangutans in Central Sumatra, and their relationship to *P. tapanuliensis*. Based  
405 on distribution range patterns, with *P. abelii* clearly restricted to the northern parts of Sumatra [12, 65],  
406 however, we consider it most likely that all historical orangutan populations south and south-east of the  
407 current range of *P. tapanuliensis* were also *P. tapanuliensis*. If correct, this would indicate a historical  
408 extent of occurrence [74] of about 37,511 km<sup>2</sup> in the 1890s, and about 21,313 km<sup>2</sup> in the 1940s. If we  
409 compare this to the current distribution range of 1,023 km<sup>2</sup> [14, 15], it suggests that the species currently  
410 retains some 2.7% of the 1890s range and 5.0% of the 1940s range. It might even be possible to map the  
411 range going back further in time, e.g., 1750 AD as recommended by Grace et al. [9]. As populations  
412 dwindled and encounters with orangutans became increasingly rare, this may have resulted in the folklore  
413 regarding mythical creatures (*orang-pendek*, *gugu*, *sedapa* etc.) [36, 37] in Bengkulu, Jambi, and South  
414 Sumatra, indicating an even larger range. We leave it to other conservation stakeholders to determine  
415 which historical range is most appropriate (and reliable) for use as a historical baseline for *P.*  
416 *tapanuliensis*, and also for setting an aspirational recovery target for the long-term future (e.g., 100 years  
417 from now) towards full ecological functionality of the species [9, 28, 67].

### 418 Possible drivers of historical declines

419 While our findings indicate that orangutans disappeared from much of their historical range, it is less  
420 clear why the species declined and became locally extinct. Some populations such as those in Lumut, seen  
421 by Neumann in 1885 and by SW in 2001, but not seen since, may have become extinct quite recently  
422 because of forest loss. Other populations likely disappeared sometime in the 20<sup>th</sup> century. There have

423 been no recent confirmed records from areas west or southwest of Lake Toba, nor from the Batang Gadis  
424 region, south of the current populations. Also, while there are a number of alleged records from the area  
425 east of Padang, there are no confirmed recent records. It thus appears that a lot of these populations  
426 disappeared around a time when forests were still extensive and the commercial exploitation of forest for  
427 timber (starting in the 1970s) or their conversion to plantations (starting in the 1990s) had not yet  
428 decimated available habitats. Nevertheless, there had been significant historical deforestation prior to  
429 1950 as shown in Fig 2, mostly for small-holder agriculture and livestock, firewood and timber, and as  
430 result of wars and fires [75, 76]. For example, the colonial-era district of *Tapanoeli* (now North, South  
431 and Central Tapanuli) had an estimated forest cover of 19000 km<sup>2</sup> in a total area of 39,481 km<sup>2</sup> (48%  
432 forested) in the 1930s [75]. In 1824, one of the first European visitors to the region was astonished to see  
433 that “the plain [north of Batang Toru] was surrounded by hills from five hundred to one thousand feet  
434 high, in a state of cultivation; and the whole surrounding country was perfectly free from wood, except  
435 the summits of two or three mountains” [77]. Some orangutan populations therefore appear to have  
436 become isolated in historical times, when early agricultural development created large grassland areas.  
437 So, why did these populations become extinct? This appears to have been a combination of habitat loss  
438 and population fragmentation, and mortality rates that exceeded reproductive replacement rates.

439 Several authors have suggested that orangutan density and range on both Borneo and Sumatra were  
440 primarily determined by the ability of people to access areas and hunt orangutans [78, 79]. For example,  
441 Jentink (1889) writes that orangutans in Sumatra are only common in swamp areas like those in Singkil  
442 which are so inaccessible that they are rarely “stepped on by human feet”, apparently quoting von  
443 Rosenberg [46], who had made a similar statement a decade earlier. Wallace (1869) similarly argued that  
444 orangutans were common in swamp forest, not because these were particularly suitable ecologically but  
445 rather because human hunters rarely went there. Such hunting was certainly common in the orangutan’s  
446 range in Sumatra. Schneider [80], for example, writes that Batak people hunt orangutans with blow pipe,  
447 spears or shotguns, while young animals are often caught and sold to plantation owners.

448 Batang Gadis was populated by Loeboe people [81, p. 327] who were nomadic tribes that also occurred in  
449 Padang Lawas and “Groot-Mandailing” [82-84]. Another nomadic tribe, the Oeloes occurred around  
450 Muara Si Pongi and Pahantan (now Pakantan) [82, 85]. Similar to other nomadic people such as the Kubu  
451 further south in Sumatra [86, 87] or the Punan of Borneo [88, 89], nomadic people often prefer primate  
452 meat over other meat sources. Kreemer [84] mentioned that the Loeboe people consider primate meat a  
453 delicacy. They hunted primates, including Siamang *Symphalangus syndactylus* with blowpipes, and used  
454 snares for pigs and deer. Still, there are, to our knowledge, no specific accounts of people from the  
455 historical range of *P. tapanuliensis* hunting and eating orangutans. Nevertheless, we consider it likely  
456 that, similar to Borneo, orangutans would have been hunted for food. Van den Burg [90], in a general  
457 account about orangutans, describes how generally orangutans were shot with poison darts, after which  
458 they fell out of the trees and were killed with spears. Alternatively, they were caught alive and killed later.  
459 The whitish meat was generally grilled over a fire, and was described as soft and sweet [90]. This is also  
460 suggested by the use in local language of *juhut bontar*, or white meat, to describe orangutan [91], while  
461 descriptions of sweet meat were similarly recorded by EM on Borneo [24]. Orangutan fat, especially from  
462 adult males, was often saved for later use in the preparation of other dishes [90]. Orangutan skins and  
463 teeth were further used as amulets on Sumatra, where people hunted them with blowpipes, spears or  
464 shotguns, although this account describes the meat as tasting “unpleasant, off-putting and bitter” [80]. We  
465 do not know the extent to which hunting and collecting for zoos by foreigners contributed to *P.*  
466 *tapanuliensis* population decline, as was likely the case for *P. abelii* given the large number of animals  
467 that were killed and collected [92]. In conclusion, it seems likely that *P. tapanuliensis* were hunted as part  
468 of people’s normal selection of big game animals, although whether off-take levels were unsustainable  
469 remains unclear.

470 Marshall et al. [93] examined population viability models with 1%, 2%, and 3% additional mortality in all  
471 age classes, running 500 iterations with populations of 250 orangutans. In the best quality orangutan  
472 habitats, i.e., mosaic landscapes of swamp, riparian and hill forests [24], annual hunting rates of 1% did  
473 not cause population extinction, but did decrease population size. In less than optimal habitats, e.g.,  
474 forests at higher elevation, a 1% level of hunting caused declines to extinction irrespective of initial  
475 population size. Higher rates of hunting were unsustainable even in the highest quality habitats [93].  
476 These models were conducted for *P. pygmaeus*, but the authors thought that hunting effects would be  
477 similar for Sumatran orangutans. The best orangutan habitats would like be those with the highest soil  
478 fertility, which at levels of intermediate rainfall would also be the best areas for agriculture [94]. It is thus  
479 likely that historically *P. tapanuliensis* occurred in suboptimal habitats, where the removal of one animal  
480 from a population of 100 per year, would drive such a population to extinction. Given the available  
481 information, we consider it likely that *P. tapanuliensis* was hunted to extinction in the increasingly  
482 fragmented parts of its former range and only survived in the remote and rugged Batang Toru mountains  
483 which may have provided orangutans with a refuge from hunting. At the same time, we recognize that in  
484 the complex socio-ecological system from which orangutans disappeared many processes may have  
485 contributed, and simple, linear cause-effect reasoning may not apply.

## 486 The biases and constraints of a historical perspective

487 While the use of historical data provides useful insights about the likely historical range of orangutans on  
488 Sumatra, and possible drivers of their decline and local extinction, there is uncertainty in the data. Few of  
489 the records are based on specimens that provide evidence for the veracity of claims, and some records are  
490 only based on hearsay or alleged sightings of orangutans without further evidence. While we critically  
491 examined each record, there is subjectivity in interpreting their reliability. For example, we decided not to  
492 incorporate the many records of *orang-pendek* in our analysis, even though some of them could well have  
493 referred to orangutans. Then again, we did accept sources that reported orangutans seen by local people  
494 but not the source, e.g., Neumann [49]. Had the people in Hadjoran mentioned “*orang-pendek*” rather  
495 than orangutan, we would have rejected the information, even though it would have related to the same  
496 animal. The potential bias of this approach is obvious.

497 Another form of bias in our study is the literature accessible to us in this study. Most of our information  
498 sources are colonial-era explorers, naturalists and hunters, for which we were able to find information in  
499 the large numbers of books, newspapers and journals that have been digitized and can be searched and  
500 accessed online. This means that we are missing out on two potentially valuable data sources: 1) Local  
501 folklore about orangutans among people that live in the orangutan’s historical range; and 2) Post-  
502 independence publications and grey literature from government (e.g., forest inventories), universities  
503 (e.g., student survey reports), companies (environmental impact assessments), and local media. There is  
504 much information about orangutan folklore from Borneo (especially Sarawak), but such information does  
505 not seem to have been recorded in the anthropological literature for Sumatra. Post-independence writings  
506 from the 1950s to ca. 1980s are likely to contain many references to records of orangutans from their  
507 historical range, but such information has not yet been captured electronically and remains beyond our  
508 reach.

509 Future studies that would include more local and socio-culturally specific information, would put  
510 conservationists in a better position (with the help of local experts, anthropologists, etc.) to understand  
511 local drivers of extinction and formulate more targeted interventions. For example, information from  
512 indigenous groups that hunt and consume orangutans, versus conflict-related killing of orangutans, versus  
513 Muslim taboos against eating orangutans, versus groups that may or may not have specific ritual relations  
514 with orangutans [95], could result in locally specific management strategies for reducing killing, harming  
515 and capture of orangutans. There are also contextual specificities, e.g., transmigrants from Java or

516 tsunami refugees from Nias Island having very different experiences of forest life, land rights and  
517 reactions to orangutans compared to indigenous people in the orangutan's range. All these nuances  
518 relevant to species management require that we go beyond the confines of the data sources used for the  
519 current study. There is thus value in the historical ecology approach but there are also limitations, or in  
520 the words of the statistician George Box "All models are wrong, but some are useful" [96]. We hope our  
521 historic models add useful information to the conservation debate regarding *P. tapanuliensis*.

## 522 Implications for species conservation

523 What do our findings mean for conservation? The remaining three subpopulations of *P. tapanuliensis* are  
524 in apparent decline, threatened by conflict killing and hunting, and loss of lowland habitat [14, 20, 21,  
525 97]. Our insights from past population declines, driven by habitat loss and fragmentation and probably  
526 unsustainable mortality rates, indicate that without preventing further losses to the population, even if in  
527 the single numbers per year, the last remaining populations of the species are doomed to rapidly decline  
528 within several orangutan generation lengths [estimated at 25 years, 22]. Current killing or removal rates  
529 of *P. tapanuliensis* already meet or exceed this threshold. Two wild-captured infant *P. tapanuliensis* were  
530 reported thus far in 2020, with one confiscated from the owner and the other illegally released to avoid  
531 legal repercussions [98, 99]. Three additional infants were confiscated from Tapanuli Selatan, two in  
532 2008 and one in 2015, and one 6-year old female was confiscated from Tapanuli Utara in 2012 (Sumatran  
533 Orangutan Conservation Programme pers. comm.). Obtaining wild orangutan infants necessitates killing  
534 the mother in nearly all cases [24, 100], hence these infants are assumed to represent two adult females  
535 killed in the first six months of 2020 alone, and another three between 2008 and 2015. Such records are  
536 indicative of a lowest minimum number of killings, as they represent only criminal acts that have been  
537 detected and acted upon, which is a fraction of the total orangutan-related wildlife crime [101, 102].  
538 Records of an adult male killed in 2013 (OIC pers. comm. 2020), a male severely injured by humans in  
539 2019 [103], and another male captured and translocated twice in the past 12 months due to complaints  
540 about crop raiding from local community members [104] suggest that killings have been ongoing in  
541 recent years, although prior to 2017 most detected incidents would have been recorded as *P. abelii*. While  
542 translocation has been used as a response to orangutans in conflict with humans, translocated animals are  
543 not monitored beyond a few days following release, sometimes not at all, and their long-term survival is  
544 not known. Behavioural traits of female site fidelity and male territoriality, and adaption issues *P.*  
545 *pygmaeus* released in unfamiliar habitats indicate that translocation risks are high and survival rates may  
546 be low [101, 105].

547 Long-term protection of *P. tapanuliensis* requires that mortality rates of <1% per year are maintained  
548 over long (decadal) time frames across the species' range. This also means that that all subpopulations  
549 have to remain connected, because once connections between populations are lost this should result in  
550 higher extinction risks for the remaining subpopulations, as was modeled for *P. pygmaeus* [30]. Within  
551 the subpopulations, the prevention of killing and translocation or rescues is urgently needed, which  
552 requires innovative management of crop conflicts [106, 107], and effective law enforcement and  
553 awareness campaigns. Such campaigns have so far had insufficient impact on reducing orangutan losses  
554 and new approaches may be required [108]. This could include, for example, direct conditional payments  
555 to rural communities for maintaining habitats and preventing any deaths or harm, i.e., orangutan  
556 guardians [109] or support for "buffer gardens" to concentrate crop losses from orangutan foraging into  
557 areas acceptable to communities [110]. Viable conservation solutions that prevent the extinction of *P.*  
558 *tapanuliensis* require an awareness of the specific problem posed by small-scale anthropogenic factors  
559 that have driven historical declines. Addressing these factors requires more targeted interventions, for  
560 example, through a conservation plan that is tailored specifically to the needs and characteristics of *P.*



561 *tapanuliensis* and the different socio-ecological drivers of its decline, rather than a generic national-level  
562 approach that encompasses a huge range of contexts and all three species [111].

563 Currently, *P. tapanuliensis* is rated Critically Endangered A4bcd on the IUCN Red List [112] an  
564 “observed, estimated, inferred, projected or suspected population size reduction of  $\geq 80\%$  over three  
565 generation periods (i.e., 75 years), where the time period must include both the past and the future, and  
566 where the reduction or its causes may not have ceased or may not be understood or may not be reversible,  
567 based on (b) an index of abundance appropriate to the taxon; (c) a decline in area of occupancy, extent of  
568 occurrence and/or quality of habitat; and (d) actual or potential levels of exploitation [22]. The  
569 information from the current information makes it likely that a similar decline population size reduction  
570 of  $\geq 80\%$  has occurred over the past 75 years, based on the estimated reduction of the Extent of  
571 Occurrence [see 74] of 95–97 % over 100 to 150 years. This would qualify the species as Critically  
572 Endangered A4bcd and A2cd.

573 Given the high extinction risks, it is important that a comprehensive plan of action is developed for the  
574 species that accurately determines how many animals remain, the level of gene flow between  
575 subpopulations, current loss rates (including removal of animals in rescues and translocations), and works  
576 towards full and permanent protection of all remaining habitat and enforcement of zero unnatural losses.  
577 Such a conservation management plan would need clarity about long-term funding, organizational  
578 responsibilities, and clear, science-based plan to allow the *P. tapanuliensis* population to stop declining,  
579 or better, increase to safer population numbers. Without such concerted and coordinated action, the  
580 remaining populations of *P. tapanuliensis* are doomed to follow their historical predecessors on their path  
581 to rapid extinction.

## 582 Acknowledgements

583 We thank Herman Rijksen for inspiring to access the historical literature on orangutans, Gabriella  
584 Fredriksson, Graham Usher, and Liana Chua for providing comments on an earlier version of this  
585 manuscript, Matthew Minarchek for sharing Carpenter’s interview data, which allowed us to update the  
586 historical range maps, and Molly Grace and Mike Hoffmann for suggesting how we could map the  
587 historical ranges. We also thank three reviewers for their constructive comments.

## 588 References

- 589 1. Doherty TS, Dickman CR, Nimmo DG, Ritchie EG. Multiple threats, or multiplying the threats?  
590 Interactions between invasive predators and other ecological disturbances. *Biological Conservation*.  
591 2015;190:60-8. doi:10.1016/j.biocon.2015.05.013.
- 592 2. Kapos V, Balmford A, Aveling R, Bubb P, Carey P, Entwistle A, et al. Outcomes, not implementation,  
593 predict conservation success. *Oryx*. 2009;43(3):336-42. doi:10.1017/S0030605309990275.
- 594 3. Sutherland W. Evidence-based Conservation. *Conservation in Practice*. 2003;4(3):39-42.  
595 doi:10.1111/j.1526-4629.2003.tb00068.x.
- 596 4. Balint PJ, Stewart RE, Desai A, Walters LC. Wicked environmental problems: managing uncertainty and  
597 conflict. Washington: Island Press; 2011.
- 598 5. Game E, Meijaard E, Sheil D, McDonald-Madden E. Conservation in a wicked complex world; challenges  
599 and solutions. *Conservation Letters*. 2014;7(3):271-7. doi:10.1111/conl.12050.
- 600 6. Adams WM, Sandbrook C. Conservation, evidence and policy. *Oryx*. 2013;47(3):329-35.  
601 doi:10.1017/S0030605312001470.
- 602 7. Gaveau DLA, Wich S, Epting J, Juhn D, Kanninen M, Leader-Williams N. The future of forests and  
603 orangutans (*Pongo abelii*) in Sumatra: predicting impacts of oil palm plantations, road construction, and  
604 mechanisms for reducing carbon emissions from deforestation. *Environmental Research Letters*.  
605 2009;4(3):34013. doi:10.1088/1748-9326/4/3/034013.

- 606 8. Meijaard E, Sheil D. The Moral Minefield of Ethical Oil Palm and Sustainable Development. *Frontiers in*  
607 *Forests and Global Change*. 2019;2(22). doi:10.3389/ffgc.2019.00022.
- 608 9. Grace M, Akçakaya HR, Bennett E, Hilton-Taylor C, Long B, Milner-Gulland EJ, et al. Using historical  
609 and palaeoecological data to inform ambitious species recovery targets. *Philosophical Transactions of the*  
610 *Royal Society B: Biological Sciences*. 2019;374(1788):20190297. doi:10.1098/rstb.2019.0297.
- 611 10. Swetnam TW, Allen CD, Betancourt JL. Applied historical ecology: Using the past to manage for the  
612 future. *Ecological Applications*. 1999;9(4):1189-206. doi:10.1890/1051-  
613 0761(1999)009[1189:AHEUTP]2.0.CO;2.
- 614 11. Spehar SN, Sheil D, Harrison T, Louys J, Ancrenaz M, Marshall AJ, et al. Orangutans venture out of the  
615 rainforest and into the Anthropocene. *Science Advances*. 2018;4:e1701422. doi:10.1126/sciadv.1701422
- 616 12. Nater A, Mattle-Greminger MP, Nurcahyo A, Nowak MG, de Manuel M, Desai T, et al. Morphometric,  
617 Behavioral, and Genomic Evidence for a New Orangutan Species. *Current Biology*. 2017.  
618 doi:10.1016/j.cub.2017.09.047.
- 619 13. Meijaard E. A survey of some forested areas in South and Central Tapanuli, North Sumatra; new chances  
620 for orangutan conservation. Wageningen: Tropenbos and the Golden Ark; 1997.
- 621 14. Wich SA, Fredriksson G, Usher G, Kuhl H, Nowak M. The Tapanuli orangutan: Status, threats and steps  
622 for improved conservation. *Conservation Science and Practice*. 2019. doi:10.1111/csp2.33.
- 623 15. Wich SA, Singleton I, Nowak MG, Utami Atmoko SS, Nisam G, Arif SM, et al. Land-cover changes  
624 predict steep declines for the Sumatran orangutan (*Pongo abelii*). *Science Advances*. 2016;2(3):e1500789.  
625 doi:10.1126/sciadv.1500789
- 626 16. Rijksen HD. A fieldstudy on Sumatran orang utans (*Pongo pygmaeus abelii* Lesson 1827). Ecology,  
627 behaviour and conservation [PhD thesis]. Wageningen, The Netherlands: Agricultural University  
628 Wageningen; 1978.
- 629 17. Laurance WF, Wich SA, Onrizal O, Fredriksson G, Usher G, Santika T, et al. Tapanuli orangutan  
630 endangered by Sumatran hydropower scheme. *Nature Ecology & Evolution*. 2020. doi:10.1038/s41559-  
631 020-1263-x.
- 632 18. IUCN Section on Great Apes. Batang Toru Hydropower Project. Factcheck and References on Key Issues.  
633 IUCN/SSC Primate Specialist Group; 2020.
- 634 19. Wich S, Fredriksson G, Usher G, Peters H, Priatna D, Basalamah F, et al. Hunting of Sumatran orang-utans  
635 and its importance in determining distribution and density. *Biological Conservation*. 2012;146(1):163-9.
- 636 20. Nasution A, Perwitasari-Farajallah D, Utami-Atmoko SS. Declining Orangutans Population in the  
637 Unprotected Forest of Batang Toru. *Trop Life Sci Res*. 2018;29(2):77-87. doi:10.21315/tlsr2018.29.2.6.
- 638 21. Samsuri, Surati Jaya IN, Kusmana C, Murtalaksono K. Connectivity and ecological indicators analysis of  
639 tropical forest landscape in Batang Toru watershed - Indonesia. *Agriculture, Forestry and Fisheries*.  
640 2014;3(3):147-54. doi:10.11648/j.aff.20140303.12.
- 641 22. Nowak MG, Rianti P, Wich SA, Meijaard E, Fredriksson G. *Pongo tapanuliensis*. The IUCN Red List of  
642 Threatened Species 2017. 2017:e.T120588639A62. doi:10.1111/csp2.33.
- 643 23. Hooijer DA. Prehistoric teeth of man and of the orang utan from Central Sumatra, with notes on the fossil  
644 orang utan from Java and Southern China. *Zoölogische Mededelingen Rijksmuseum Leiden*. 1948;29:175 -  
645 83.
- 646 24. Rijksen HD, Meijaard E. Our vanishing relative. The status of wild orang-utans at the close of the twentieth  
647 century. Dordrecht, The Netherlands: Kluwer Academic Publishers; 1999. 480 p.
- 648 25. Planning Department of the Forest Service. Vegetation map of Indonesia. Scale 1: 2500000. Under  
649 supervision of L.W. Hannibal. 1950.
- 650 26. ESRI. What is ArcScan?. ArcGIS Desktop. Retrieved on 17 June 2020 from  
651 <https://desktop.arcgis.com/en/arcmap/latest/extensions/arcscan/what-is-arcscan-.htm>. 2019.
- 652 27. Laumonier Y. The vegetation of Sumatra. Bogor, Indonesia: SEAMEO-BIOTROP; 1997. 154 p.
- 653 28. Akçakaya HR, Rodrigues A, Keith D, Milner-Gulland EJ, Sanderson EW, Hedges S, et al. Assessing  
654 Ecological Function in the Context of Species Recovery. *Conservation Biology*. 2019.
- 655 29. Yamazaki D, Ikeshima D, Sosa J, Bates PD, Allen GH, Pavelsky TM. MERIT Hydro: A high-resolution  
656 global hydrography map based on latest topography datasets. *Water Resources Research*. 2019;55:5053-73.  
657 doi:10.1029/2019WR024873.
- 658 30. Bruford MW, Ancrenaz M, Chikhi L, Lackman-Ancrenaz I, Andau M, Ambu L, et al. Projecting genetic  
659 diversity and population viability for the fragmented orang-utan population in the Kinabatangan floodplain,  
660 Sabah, Malaysia. *Endangered Species Research*. 2010;12:249-61. doi:10.3354/esr00295.

- 661 31. Nietlisbach P, Arora N, Nater A, Goossens B, van Schaik CP, Krutzen M. Heavily male-biased long-  
662 distance dispersal of orang-utans (genus: Pongo), as revealed by Y-chromosomal and mitochondrial genetic  
663 markers. *Molecular Ecology*. 2012;21(13):3173-86.
- 664 32. Tulp N. Chapter 56. Een Indiaansche Satyr. *Geneeskundige Waarnemingen van Nikolaas Tulp*. Leiden:  
665 Juriaan Wishoff; 1641 [1740]. p. 370-9.
- 666 33. Dobson J. John Hunter and the early knowledge of Anthropoid apes. *Proceedings of the Zoological Society*  
667 *of London*. 1953-54;123:1-16.
- 668 34. Reynolds VA. The apes. The gorilla, chimpanzee, orangutan, and gibbon. Their history and their world  
669 New York: Harper & Row 1967.
- 670 35. Schlegel H, Müller S. Bijdragen tot de natuurlijke historie van den orang-oetan (*Simia satyrus*). In:  
671 Temminck CJ, editor. *Verhandelingen over de natuurlijke geschiedenis der Nederlandsche overzeesche*  
672 *bezigtingen: Zoologie*. Leiden, the Netherlands: Van den Koning; 1841. p. 28.
- 673 36. Jacob JC. Een merkwaardige ontmoeting op den top van den Smeroe. *De Tropische Natuur*. 1938;27:115-9.
- 674 37. Forth G. Gugu. Evidence from Folk Zoological Nomenclature and Classification for a Mystery Primate in  
675 Southern Sumatra. *Anthropos*. 2014;109(1):149-60. doi:10.5771/0257-9774-2014-1-149.
- 676 38. Martyr D. The other orang. *BBC Wildlife*. 1993 October 1993:35 - 6.
- 677 39. Westenik LC. Orangpandak (boschmensen) op Sumatra. *Tropische Natuur*. 1919;7:108- 10.
- 678 40. Dammerman KW. De Orang Pandak of Aapmensch van Sumatra. *Mensch en maatschappij*. 1927;3(2):76-  
679 80.
- 680 41. Radje (De) van Rokan. Interview met den radja van Rokan. *De Sumatra Post*. 1933;2 May 1933.
- 681 42. Müller S. Berigten over Sumatra. *De Gids*, afdeling Wetenschappelijke Bijdragen. **1837**;1:1-35.
- 682 43. anonymous. Varia - Ontvoering van een meisje door apen. *Tijdschrift voor Neerland's Indië*.  
683 1892;21(7):399-400.
- 684 44. Müller DS, Horner DL. Fragmenten uit de Reizen en Onderzoekingen in Sumatra (Vervolg van Deel III,  
685 blz. 72). Bijdragen tot de taal-, land- en volkenkunde / *Journal of the Humanities and Social Sciences of*  
686 *Southeast Asia*. 1855;3(1):193-228. doi:10.1163/22134379-90001160.
- 687 45. Ludeking EWA. Natuur- en Geneeskundige topographische schets der residentie Agam, (westkust van  
688 Sumatra). *Geneeskundig Tijdschrift voor Nederlandsch-Indië*. 1862;4:1-153.
- 689 46. von Rosenberg H. *Der Malayische Archipel. Land und Leute*. Leipzig 1878.
- 690 47. Snelleman JF. Bijdragen tot de Kennis der Fauna van Midden-Sumatra. Eerste Deel. Veth PJ, editor.  
691 Leiden: E.J. Brill; 1887.
- 692 48. Kramm W. Tochtjes in Tapanoei. *Sumatra-Courant*. 1879;20(180 (Thursday 30 October)):1-2.
- 693 49. Neumann JB. Het Pane- en Bila-stroomgebied op het eiland Sumatra. *Tijdschrift Nederlandsch*  
694 *Aardrijkskundig Genootschap*. 1885;2(II):2 and 1-133 (also III, 1-99, 215-314 & 457-543; IV, 1-110&217-  
695 319).
- 696 50. Twiss F. Eenige opmerkingen naar aanleiding van Dr. B. Hagen's beschrijvingen der planten- en  
697 dierenwereld van Deli. *Tijdschrift van het Aardrijkskundig Genootschap*. 1890:1060-3.
- 698 51. L.H. Tocht naar het rijk van Poeloe-Lawan (Sumatra's Oostkust). Onderzoek van het stroomgebied der  
699 Battang-Nila. *Tijdschrift van het binnenlandsch bestuur* 1889;3:129-67.
- 700 52. Hagen B. Die Pflanzen- und Thierwelt von Deli auf der Ostkuste Sumatra's. *Naturwissenschaftliche*  
701 *Skizzen und Beitrage*. *Tijdschrift Nederlandsch Aardrijkskundig Genootschap*. 1890;7(1):1-240.
- 702 53. Miller GS. Mammals collected by Dr. W.L. Abbott on the coast and islands of northwest Sumatra.  
703 *Proceedings US National Museum, Washington*. 1903;26:437-84.
- 704 54. Beccari O. Wanderings in the great forests of Borneo. From the English translation published by Archibald  
705 Constable & Co. Ltd, London, reprinted in 1986. Oxford, UK: Oxford University Press; 1904. 424 p.
- 706 55. Agnelli P, Becchi C, Cecconi S, Fontani S, Guimaraes S, Moggi I. Indagine storico e studio morfometrico  
707 dell'esemplare di *Pongo pygmaeus* no MZUF 12. Museo di Storia Naturale dell'Univercità degli Studi di  
708 Firenze. Sezione di Zoologia "La Specola"; 2002.
- 709 56. Volz W. Über die Verbreitung einiger anthropoiden Affen in Sumatra. *Biologische Centralblatt*.  
710 1904;24(14):475-6.
- 711 57. Volz W. Nord-Sumatra; bericht über eine im auftrage der Humboldt-stiftung der Königlich preussischen  
712 akademie der wissenschaften zu Berlin in den jahren 1904-1906 augeführte Forschungsreise. Bd. II. Die  
713 Gajolander. Berlin: Dietrich Reimer (E. Vohsen); 1912.
- 714 58. Köhler HJ. Habinsaran. Het land van den zonnestraal. Mijn leven onder de Bataks. Zutphen: W.J. Thieme  
715 & Cie; 1926.

- 716 59. Delmont J. Levende Natuur: Het Vangen Van Wilde Dieren. De liefde van een Orang-Oetan-wijffe.  
717 Nieuwsblad Van Het Noorden. 1930(December 27, 1930):3.
- 718 60. van Heurn FC. De anthropoide apen, de rhinocerossen en het baardzwijn. The Netherlands: Overgedrukt uit  
719 de Mededeeling van de Nederlandsche Commissie for Internationale Natuurbescherming, Biologische  
720 Aanteekeningen over eenige belangrijke diersoorten van Java, Sumatra en Borneo; 1935. Report No.:  
721 No.10 Supplement.
- 722 61. Carpenter CR. A survey of wildlife conditions in Atjeh, North Sumatra. Mededelingen Nederlandsche  
723 Commissie voor Internationale Natuurbescherming. 1938;12:1-33.
- 724 62. Nederlandsch-Indische Vereeniging tot Natuurbescherming. 3 Jaren Indisch natuur leven. Opstellen over  
725 landschappen, dieren en planten, tevens elfde verslag (1936-1938). Batavia, Indonesia: Nederlandsch-  
726 Indische Vereeniging tot Natuurbescherming; 1939. 430 p.
- 727 63. Borner M. Sumatra's orang-utans. Oryx 1976;13:290-3. doi:10.1017/S0030605300013752.
- 728 64. Wilson CC, Wilson WL. Behavioral and morphological variation among primate populations in Sumatra.  
729 Yearbook of Physical Anthropology. 1977;20:207-23.
- 730 65. Wich SA, Singleton I, Utami-Atmoko SS, Geurts ML, Rijksen HD, van Schaik CP. The status of the  
731 Sumatran orang-utan *Pongo abelii*: an update. Oryx. 2003;37(1):49-54. doi:10.1017/S0030605303000115.
- 732 66. Bradshaw CJA, Isagi Y, Kaneko S, Brook BW, Bowman DMJS, Frankham R. Low genetic diversity in the  
733 bottlenecked population of endangered non-native banteng in northern Australia. Molecular Ecology.  
734 2007;16(14):2998-3008. doi:10.1111/j.1365-294X.2007.03365.x.
- 735 67. Akçakaya HR, Bennett EL, Brooks TM, Grace MK, Heath A, Hedges S, et al. Quantifying species recovery  
736 and conservation success to develop an IUCN Green List of Species. Conservation Biology.  
737 2018;32(5):1128-38. doi:doi.org/10.1111/cobi.13112.
- 738 68. Sanderson EW. A full and authentic reckoning of species' ranges for conservation: response to Akçakaya  
739 et al. 2018. Conservation Biology. 2019;33(5):1208-10. doi:10.1111/cobi.13399.
- 740 69. Sembiring J, Azvi TS. Estimation of orangutan populations in Sibongkaras Pakpak Bharat village forest  
741 area. Journal of Islamic Science and Technology. 2019;6(1):133-45. doi:10.22373/ekw.v6i1.5549.
- 742 70. Utami Atmoko SS, Sihite J, Nuzuar, Singleton I. Perkembangan terbaru dan sabaran orangutan sumatera  
743 (*Pongo abelii*). In: Susilo HD, Utami Atmoko SS, Sihite J, editors. Workshop Proceedings: International  
744 Workshop on Orangutan Conservation, Sanur, Bali, Indonesia 20102012. p. 105-10.
- 745 71. Nater A, Arora N, Greminger MP, van Schaik CP, Singleton I, Wich SA, et al. Marked Population  
746 Structure and Recent Migration in the Critically Endangered Sumatran Orangutan (*Pongo abelii*). Journal  
747 of Heredity. 2013;104(1):2-13. doi:10.1093/jhered/ess065.
- 748 72. Louys J, Zaim Y, Rizal Y, Aswan, Puspaningrum M, Trihascaryo A, et al. Sumatran orangutan diets in the  
749 Late Pleistocene as inferred from dental microwear texture analysis. in press.
- 750 73. Drawhorn GM. The systematics and Paleodemography of fossil Orangutans (Genus *Pongo*) [PhD  
751 Dissertation]: University of California; 1994.
- 752 74. IUCN. IUCN Red List Categories and Criteria: Version 3.1. Second edition. Gland, Switzerland and  
753 Cambridge, UK: Species Survival Commission, IUCN; 2012. ii + 30 pp p.
- 754 75. van Steenis CGGJ. Maleische Vegetatieschetsen I: Toelichting bij de Plantengeografische Kaart van  
755 Nederlandsch Oost Indië. In: Brill EJ, editor. Tijdschrift van het Koninklijk Nederlandsch Aardrijkskundig  
756 Genootschap, Tweede Serie Deel Lii. Leiden, The Nederlandsch1935. p. 1-56.
- 757 76. Endert FH. Boschbouwkundige aanteekeningen over een reis in Atjeh, Sum. Oostkust, Tapanuli en  
758 Sumatra' Westkust. Tectona. 1925;18:1-60.
- 759 77. Burton R, Ward N. Report on a journey into Batak country in the interior of Sumatra in the year 1824.  
760 Transactions of the Royal Asiatic Society. 1827;1:485-513.
- 761 78. Jentink JA. On a collection of mammals from East-Sumatra. Proceedings of the Zoological Society of  
762 London. 1889;11:17-30.
- 763 79. Wallace AR. The Malay Archipelago. reprinted in 1986 ed. Oxford: Oxford University Press; 1869. 625 p.  
764 80. Schneider G. Ergebnisse zoologischer Forschungsreisen in Sumatra. Erster Teil. Säugetiere (Mammalia).  
765 Zoologischer Jahrbücher Abteilung für Systematik, Geographie und Biologie der Tiere. 1906;23:1-172.
- 766 81. Reitsma SA. Van Stockums's travellers' handbook for the Dutch East Indies: Van Stockum; 1930. XI, 613  
767 p. p.
- 768 82. Joustra M. Batakspiegel: S.C. van Doesburgh; 1926. XVI, 382 p p.
- 769 83. van Dijk PALE. Rapport over de Loeboe-bevolking in de onder afdeeling Groot-Mandheling en Batang  
770 Natal. Bijdragen tot de taal-, land- en volkenkunde van Nederlandsch-Indië. 1884;8:151-61.

- 771 84. Kreemer J. De Loeboes in Mandailing. Bijdragen tot de Taal-, Land- en Volkenkunde van Nederlandsch-  
772 Indië. 1912;66:303-36.
- 773 85. Ris H. De Onderafdeeling Klein Mandailing Oeloe en Pahantan en Hare Bevolking met Uitzondering van  
774 de Oeloe's. Bijdragen tot de Taal-, Land- en Volkenkunde van Nederlandsch-Indië. 1896;46(3):441-534.
- 775 86. Veth PJ. Midden-Sumatra. Reizen en Onderzoekingen der Sumatra Expeditie 1877-1879. Derde Deel.  
776 Volksbeschrijving en Taal. Leiden: E.J. Brill; 1892.
- 777 87. Van Dongen GJ, Wesly LF. De Koeboes in de Onderafdeeling Koeboestrecken der Residentie Palembang.  
778 Bijdragen tot de Taal-, Land- en Volkenkunde van Nederlandsch-Indië. 1910;63(3/4):177-336.
- 779 88. Stolk JJ. Opsporing van den zwerfenden stam der Penjaboeng-Poenan's, op de waterscheiding der Barito  
780 met de Mahakam en Kapoeas (Midden-Borneo), in Oct. 1905. Koninklijk Nederlands Aardrijkskundig  
781 Genootschap. 1907;24.
- 782 89. Spaan AH. Een landreis van Berouw naar Samarinda. Koninklijk Nederlands Aardrijkskundig  
783 Genootschap. 1901;18.
- 784 90. van den Burg CL. De Voeding in Nederlandsch-Indië. Amsterdam: J.H. de Bussy; 1904. 546 p.
- 785 91. KamusDaerah. <https://www.kamusdaerah.com/?bhs=b&bhs2=a&q=juhut>. 2020.
- 786 92. Minarchek M. Plantations, Peddlers, and Nature Protection: The Transnational Origins of Indonesia's  
787 Orangutan Crisis, 1910–1930. *TRaNS: Trans -Regional and -National Studies of Southeast Asia*.  
788 2018;6(1):101-29. doi:10.1017/trn.2017.18.
- 789 93. Marshall AJ, Lacy R, Ancrenaz M, Byers O, Husson S, Leighton M, et al. Orangutan population biology,  
790 life history, and conservation. Perspectives from population viability analysis models. In: Wich S, Atmoko  
791 SU, Mitra Setia T, van Schaik CP, editors. *Orangutans: geographic variation in behavioral ecology and  
792 conservation*. Oxford, UK: Oxford University Press; 2009. p. 311-26.
- 793 94. Santika T, Ancrenaz M, Wilson KA, Spehar S, Abram N, Banes GL, et al. First integrative trend analysis  
794 for a great ape species in Borneo. *Scientific Reports*. 2017;7(1):4839. doi:10.1038/s41598-017-04435-9.
- 795 95. Gunawan A. N. Sumatra stakeholders unite under local wisdom to protect Tapanuli orangutan.  
796 [https://www.thejakartapost.com/life/2019/11/25/n-sumatra-stakeholders-unite-under-local-wisdom-to-  
797 protect-tapanuli-orangutan.html](https://www.thejakartapost.com/life/2019/11/25/n-sumatra-stakeholders-unite-under-local-wisdom-to-protect-tapanuli-orangutan.html). The Jakarta Post. 2019;November 25, 2019.
- 798 96. Box GEP. Robustness in the strategy of scientific model building. In: Launer RL, Wilkinson GN, editors.  
799 *Robustness in Statistics*: Academic Press; 1979. p. 201–36.
- 800 97. Nowak MG, Rianti P, Wich SA, Meijaard E, Fredriksson G. Pongo tapanuliensis. The IUCN Red List of  
801 Threatened Species 2017.
- 802 98. Karokaro AS. Call for prosecution of Indonesian politician who kept baby orangutan as pet.  
803 [https://news.mongabay.com/2020/02/tapanuli-orangutan-indonesia-sumatra-official-nikson-nababan-pet/  
804 Mongabay](https://news.mongabay.com/2020/02/tapanuli-orangutan-indonesia-sumatra-official-nikson-nababan-pet/). 2020(26 February 2020).
- 805 99. Pasaribu O. Anak Orangutan Tapanuli Masuk Perkampungan, Ditemukan Warga dalam Kondisi Lemah.  
806 [https://regional.kompas.com/read/2020/06/19/13323731/anak-orangutan-tapanuli-masuk-perkampungan-  
807 ditemukan-warga-dalam-kondisi](https://regional.kompas.com/read/2020/06/19/13323731/anak-orangutan-tapanuli-masuk-perkampungan-ditemukan-warga-dalam-kondisi). Kompas. 2020;19 June 2020.
- 808 100. Russon AE. Orangutan rehabilitation and reintroduction. In: Wich S, Atmoko SU, Setia TM, van Schaik  
809 CP, editors. *Orangutans: Geographic variation in behavioral ecology and conservation*. Oxford, UK:  
810 Oxford University Press; 2009. p. 327-50.
- 811 101. Sherman J, Ancrenaz M, Meijaard E. Shifting apes: Conservation and welfare outcomes of Bornean  
812 orangutan rescue and release in Kalimantan, Indonesia. *Journal for Nature Conservation*. 2020;55.  
813 doi:10.1016/j.jnc.2020.125807.
- 814 102. Freund C, Rahman E, Knott C. Ten years of orangutan-related wildlife crime investigation in West  
815 Kalimantan, Indonesia. *American Journal of Primatology*. 2017;79(11):22620. doi:10.1002/ajp.22620.
- 816 103. Gunawan A. Malnourished, injured Tapanuli orangutan rehabilitated and released.  
817 [https://www.thejakartapost.com/news/2019/12/10/malnourished-injured-tapanuli-orangutan-rehabilitated-  
818 and-released.html](https://www.thejakartapost.com/news/2019/12/10/malnourished-injured-tapanuli-orangutan-rehabilitated-and-released.html). The Jakarta Post. 2019;10 December 2019.
- 819 104. KSDAE. Penanganan Konflik Orangutan di Adiankoting Sumatera Utara.  
820 <http://ksdae.menlhk.go.id/info/7489/penanganan-konflik-orangutan-di-adiankoting-sumatera-utara.html>.  
821 Ministry of Environment and Forestry. 2020;16 January 2020.
- 822 105. Ancrenaz M, Oram F, Nardiyono, Silmi M, Jopony MEM, Voigt M, et al. The importance of orangutans in  
823 small fragments for maintaining metapopulation dynamics. *bioRxiv*. 2020:2020.05.17.100842.  
824 doi:10.1101/2020.05.17.100842.

- 825 106. Campbell-Smith G, Campbell-Smith M, Singleton I, Linkie M. Raiders of the Lost Bark: Orangutan  
826 Foraging Strategies in a Degraded Landscape. *PloSONE*. 2011;6 (6):e20962.  
827 doi:10.1371/journal.pone.0020962.
- 828 107. Campbell-Smith G, Sembiring R, Linkie M. Evaluating the effectiveness of human-orangutan conflict  
829 mitigation strategies in Sumatra. *Journal of Applied Ecology*. 2012;49:367-75. doi:10.1111/j.1365-  
830 2664.2012.02109.x.
- 831 108. Karokaro AS, Hanafiah J. Indonesia rescues captive orangutans, but leaves their owners untouched.  
832 Mongabay. 2019 February 8 2019.
- 833 109. Schoneveld-de Lange N, Meijaard E, Löhr A. South to south learning in great ape conservation. *American*  
834 *Journal of Primatology*. 2016;78(6):669-78. doi:10.1002/ajp.22531.
- 835 110. Gehrke V. Insights from Indonesia: The Social Impact of Environmental Conservation.  
836 <https://savegorangutans.org/insights-from-indonesia-the-social-impact-of-environmental-conservation/>.  
837 GCOCP. 2020;3 August 2020.
- 838 111. Ditjen KSDAE. Strategi dan Rencana Aksis Konservasi Orangutan Indonesia 2019-2029. Jakarta,  
839 Indonesia: Kementerian Lingkungan Hidup dan Kehutanan Republik Indonesia; 2019.
- 840 112. IUCN. The IUCN Red List of Threatened Species. Version 2019-2. <https://www.iucnredlist.org>. Gland,  
841 Switzerland; 2019.

842
